# Supplementary material for: IFI44L and C1QTNF5 as promising biomarkers of proliferative diabetic retinopathy
Source: PubMed Central journal article supplement (PMC9704899; doi:10.1097/md.0000000000031961), 2022-11-25
Supplement: medi-101-e31961-s001.pdf [file medi-101-e31961-s001.pdf]

**Table S1** Statistic of gene modules constructed by WGCNA in GSE64036

| ID | Color       | Module size | Cor. with PDR |
|----|-------------|-------------|---------------|
| 1  | Black       | 200         | 0.19          |
| 2  | Blue        | 424         | 0.8           |
| 3  | Brown       | 422         | 0.67          |
| 4  | Green       | 282         | -0.33         |
| 5  | Greenyellow | 62          | 0.35          |
| 6  | Grey        | 19          | -0.074        |
| 7  | Magenta     | 142         | -0.054        |
| 8  | Pink        | 170         | 0.77          |
| 9  | Purple      | 76          | 0.18          |
| 10 | Red         | 231         | -0.1          |
| 11 | Salmon      | 44          | -0.15         |

|    |           |      |       |
|----|-----------|------|-------|
| 12 | Tan       | 53   | -0.76 |
| 13 | Turquoise | 2568 | -0.41 |
| 14 | Yellow    | 307  | -0.57 |

---

WGCNA: weighted gene co-expression network analysis. Cor. with PDR:  
Correlation coefficient with proliferative diabetic retinopathy.
