# Supplementary material for: IFI44L and C1QTNF5 as promising biomarkers of proliferative diabetic retinopathy
Source: PubMed Central journal article supplement (PMC9704899; doi:10.1097/md.0000000000031961), 2022-11-25
Supplement: medi-101-e31961-s002.pdf [file medi-101-e31961-s002.pdf]

**Table S2** Gene Ontology (GO) terms enrichment analysis of the blue module

| Category        | Term ID    | Description                                                                                                                        | Enrichment score | <i>p</i> value |
|-----------------|------------|------------------------------------------------------------------------------------------------------------------------------------|------------------|----------------|
| Biology process | GO:0043328 | protein transport to vacuole involved in ubiquitin-dependent protein catabolic process via the multivesicular body sorting pathway | 32.3             | 0.0014         |
|                 | GO:0002318 | myeloid progenitor cell differentiation                                                                                            | 25.84            | 0.0023         |
|                 | GO:0045040 | protein import into mitochondrial outer membrane                                                                                   | 25.84            | 0.0023         |
|                 | GO:0060161 | positive regulation of dopamine receptor signaling pathway                                                                         | 25.84            | 0.0023         |
|                 | GO:0032511 | late endosome to vacuole transport via multivesicular body sorting pathway                                                         | 24.23            | 0.0002         |
|                 | GO:0009136 | purine nucleoside diphosphate biosynthetic process                                                                                 | 21.53            | 0.0034         |
|                 | GO:0009180 | purine ribonucleoside diphosphate biosynthetic process                                                                             | 21.53            | 0.0034         |

|                       |            |                                                              |       |        |
|-----------------------|------------|--------------------------------------------------------------|-------|--------|
|                       | GO:0009188 | ribonucleoside diphosphate<br>biosynthetic process           | 21.53 | 0.0034 |
|                       | GO:0032020 | ISG15-protein conjugation                                    | 21.53 | 0.0034 |
|                       | GO:0045915 | positive regulation of<br>catecholamine metabolic<br>process | 21.53 | 0.0034 |
| Molecular<br>function | GO:0016508 | long-chain-enoyl-CoA<br>hydratase activity                   | 30.72 | 0.0015 |
|                       | GO:0030060 | L-malate dehydrogenase activity                              | 30.72 | 0.0015 |
|                       | GO:0042296 | ISG15 transferase activity                                   | 30.72 | 0.0015 |
|                       | GO:0000822 | inositol hexakisphosphate<br>binding                         | 20.48 | 0.0480 |
|                       | GO:0001605 | adrenomedullin receptor activity                             | 20.48 | 0.0480 |
|                       | GO:0003872 | 6-phosphofructokinase activity                               | 20.48 | 0.0480 |
|                       | GO:0003994 | aconitate hydratase activity                                 | 20.48 | 0.0480 |
|                       | GO:0004142 | diacylglycerol<br>cholinephosphotransferase<br>activity      | 20.48 | 0.0480 |
|                       | GO:0004307 | ethanolaminephosphotransferase<br>activity                   | 20.48 | 0.0480 |

|                    |            |                                         |       |        |
|--------------------|------------|-----------------------------------------|-------|--------|
|                    | GO:0004332 | fructose-bisphosphate aldolase activity | 20.48 | 0.0480 |
| Cellular component | GO:0061574 | ASAP complex                            | 33.08 | 0.0013 |
|                    | GO:0000243 | commitment complex                      | 26.47 | 0.0022 |
|                    | GO:0097422 | tubular endosome                        | 26.47 | 0.0022 |
|                    | GO:0000814 | ESCRT II complex                        | 22.05 | 0.0447 |
|                    | GO:0005945 | 6-phosphofructokinase complex           | 22.05 | 0.0447 |
|                    | GO:0031084 | BLOC-2 complex                          | 22.05 | 0.0447 |
|                    | GO:0033263 | CORVET complex                          | 22.05 | 0.0447 |
|                    | GO:0034751 | aryl hydrocarbon receptor complex       | 22.05 | 0.0447 |
|                    | GO:0035060 | brahma complex                          | 22.05 | 0.0447 |
|                    | GO:0043260 | laminin-11 complex                      | 22.05 | 0.0447 |

---
